# Supplementary material for: Phormidium autumnale Growth and Anatoxin-a Production under Iron and Copper Stress
Source: Toxins (Basel). 2013 Dec 16;5(12):2504–21. doi: 10.3390/toxins5122504 (PMC3873698; doi:10.3390/toxins5122504)
Supplement: Supplementary File 1 — Supplementary Information (PDF, 156 KB) [file toxins-05-02504-s001.pdf]

Supplementary Information

**Figure S1.** Estimated mean metal concentrations in MLA with 95% confidence intervals measured in *Phormidium autumnale* (CYN52) growth experiments: (a)  $\text{MLA}_{1 \times \text{Fe} = 1 \times \text{Cu}}$ ,  $400 \mu\text{g L}^{-1}$  Fe; (b)  $\text{MLA}_{10 \times \text{Cu}}$ ,  $\mu\text{g L}^{-1}$  Fe; (c)  $\text{MLA}_{100 \times \text{Cu}}$ ,  $400 \mu\text{g L}^{-1}$  Fe; (d)  $\text{MLA}_{0.1 \times \text{Fe}}$ ,  $40 \mu\text{g L}^{-1}$  Fe; and (e)  $\text{MLA}_{2 \times \text{Fe}}$ ,  $800 \mu\text{g L}^{-1}$  Fe;  $\blacktriangle$  control,  $\blacksquare$  treatment.  $\text{MLA}_{2 \times \text{Fe}, 1 \times \text{Cu}}$  corresponds to 800 and  $2.5 \mu\text{g L}^{-1}$  for Fe and Cu treatments, respectively. The reference ( $\text{MLA}_{1 \times \text{Fe}, 1 \times \text{Cu}}$ ) corresponds to 800 and  $2.5 \mu\text{g L}^{-1}$  for Fe and Cu treatments, respectively.

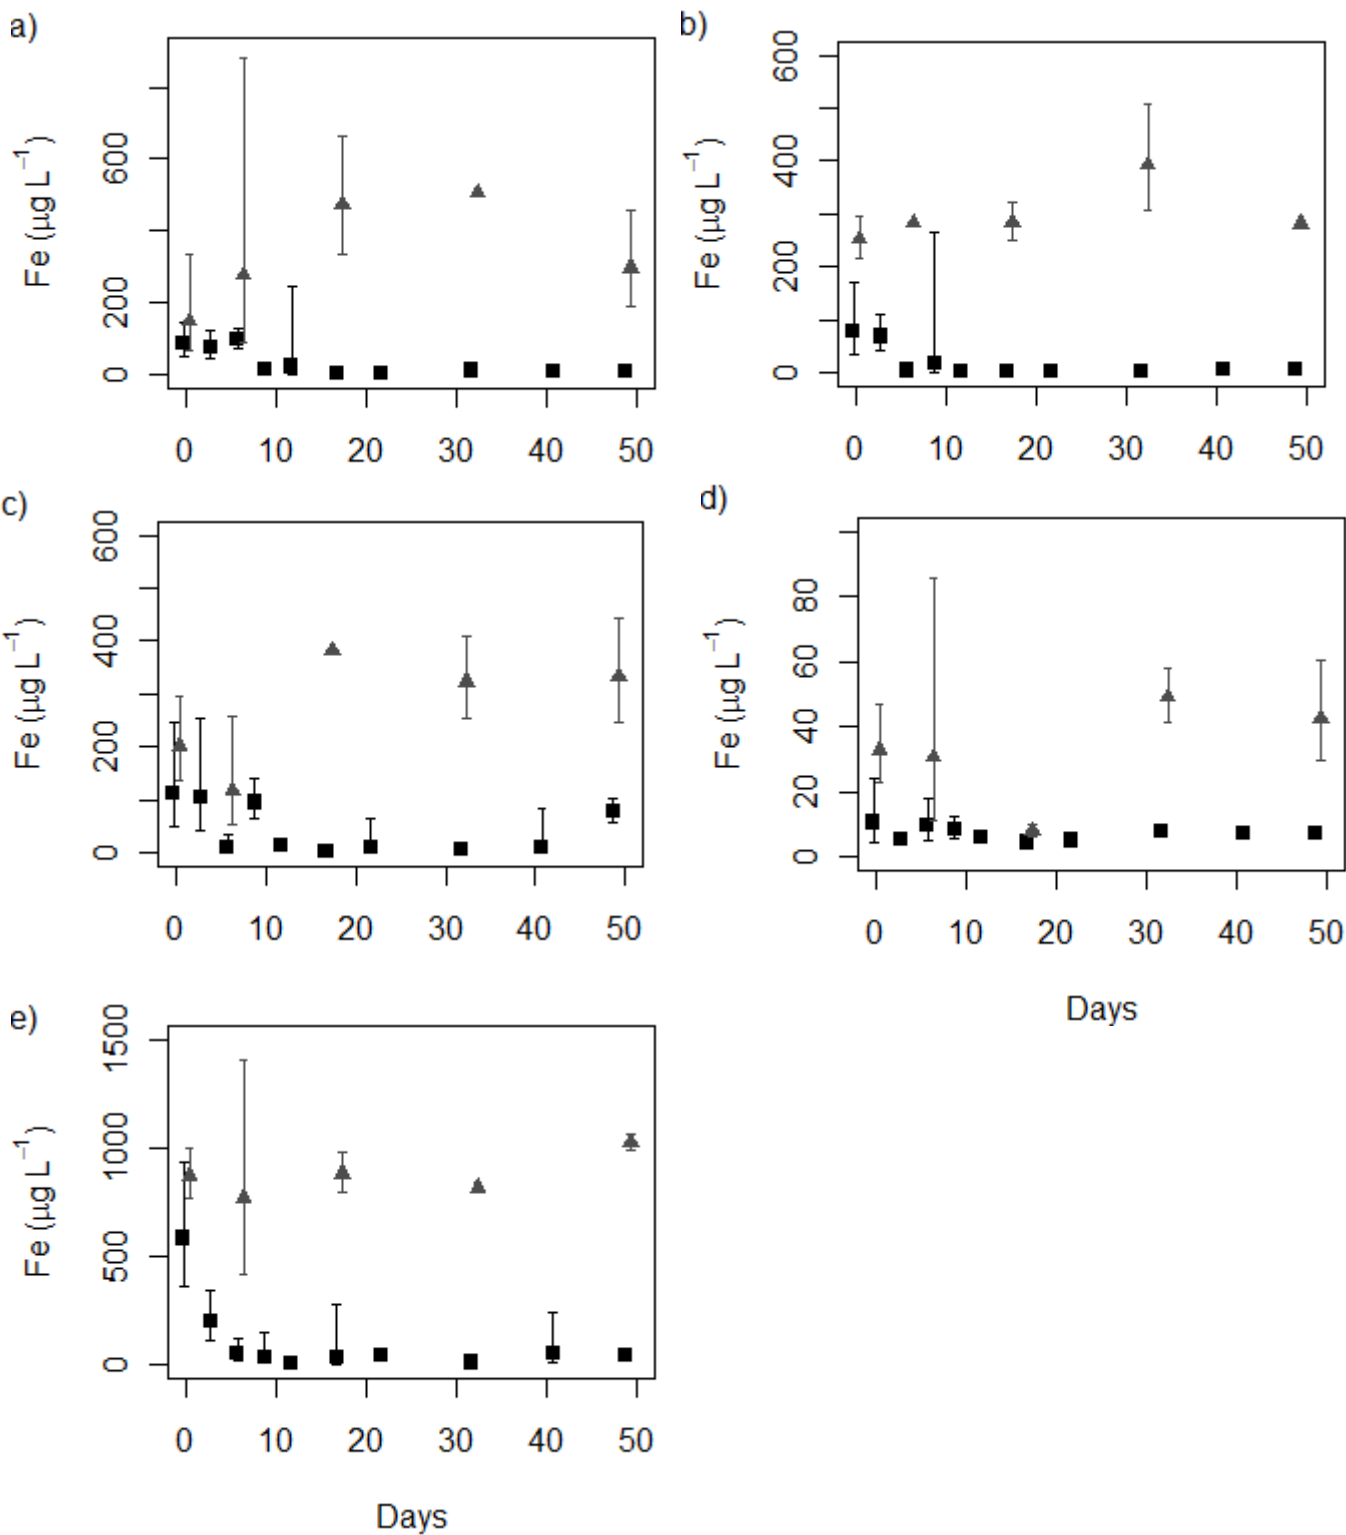

**Figure S2.** Estimated mean metal concentrations in MLA with 95% confidence intervals measured in *Phormidium autumnale* (CYN52) growth experiments: (a)  $\text{MLA}_{1 \times \text{Fe}=1 \times \text{Cu}}$ ,  $2.5 \mu\text{g L}^{-1}$  Cu; (b)  $\text{MLA}_{10 \times \text{Cu}}$ ,  $25 \mu\text{g L}^{-1}$  Cu; (c)  $\text{MLA}_{100 \times \text{Cu}}$ ,  $250 \mu\text{g L}^{-1}$  Cu; (d)  $\text{MLA}_{0.1 \times \text{Fe}}$ ,  $2.5 \mu\text{g L}^{-1}$  Cu; and (e)  $\text{MLA}_{2 \times \text{Fe}}$   $\mu\text{g L}^{-1}$  Cu;  $\blacktriangle$  control,  $\blacksquare$  treatment.  $\text{MLA}_{2 \times \text{Fe}, 1 \times \text{Cu}}$  corresponds to 800 and  $2.5 \mu\text{g L}^{-1}$  for Fe and Cu treatments, respectively. The reference ( $\text{MLA}_{1 \times \text{Fe}, 1 \times \text{Cu}}$ ) corresponds to 800 and  $2.5 \mu\text{g L}^{-1}$  for Fe and Cu treatments, respectively.

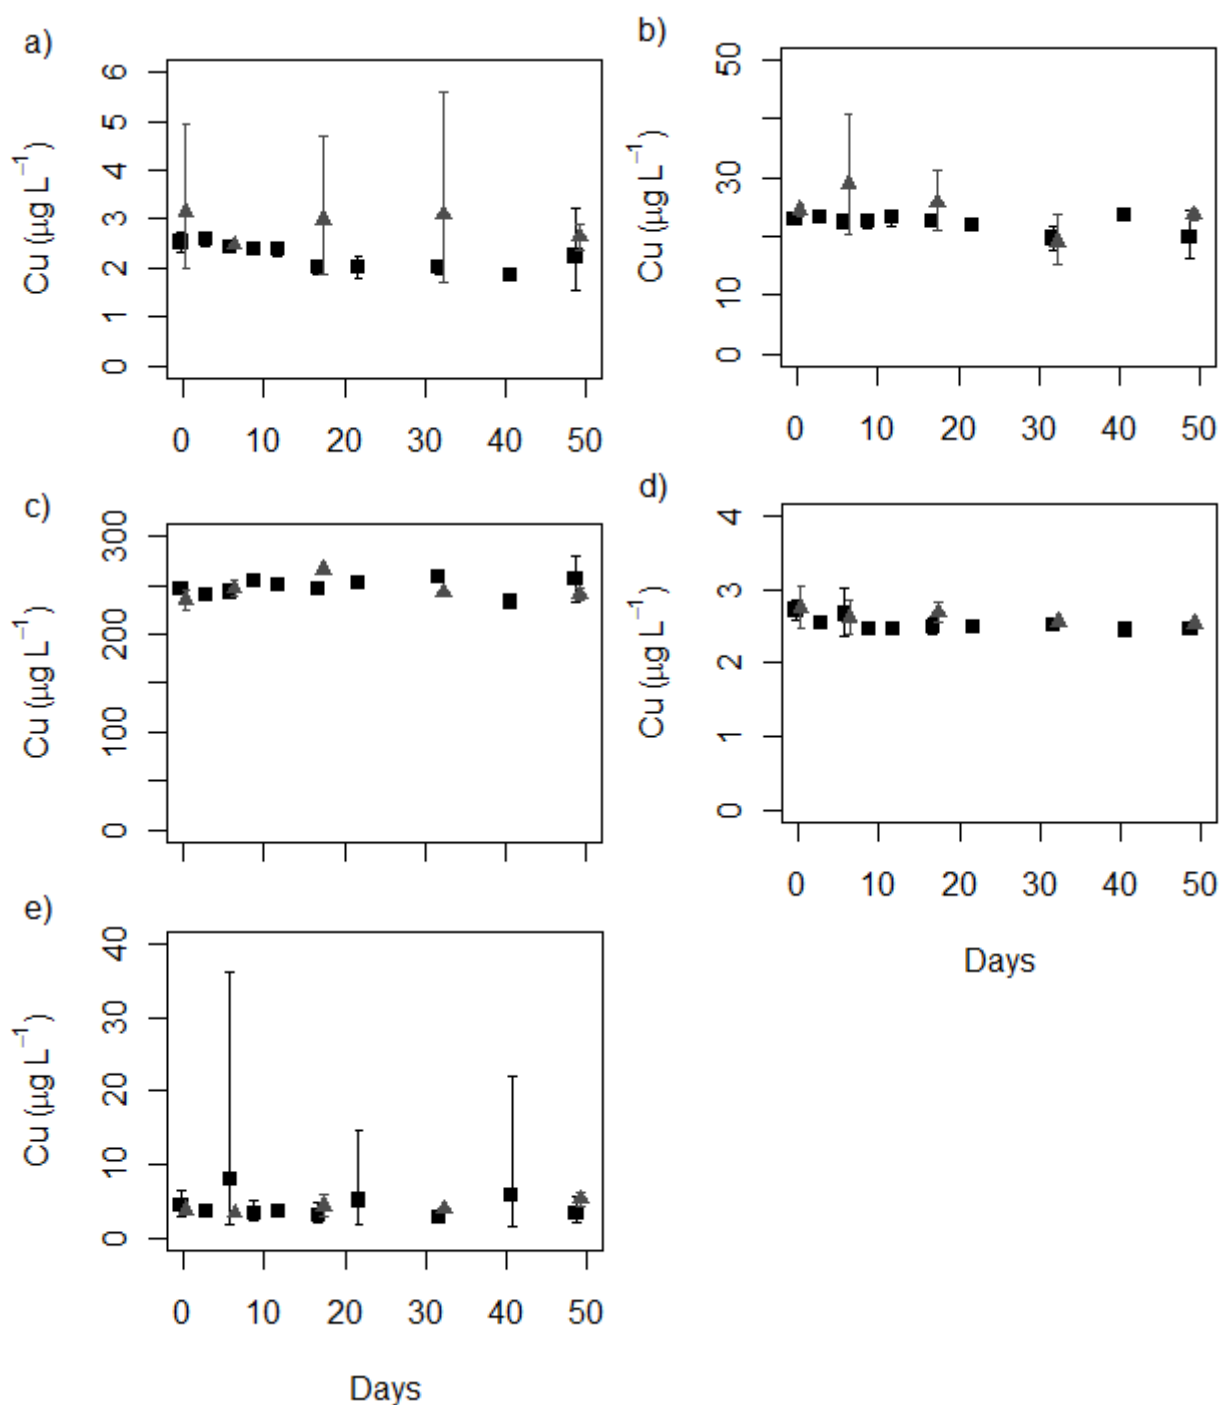

**Table S1.** Comparison of different growth models using Akaike Information Criteria (AIC) to evaluate the goodness of fit. For each dataset, a linear model (explaining the overall trend of the data over time) was compared to a categorical model (where days were treated as a factor) and intercept model (where time was not a variable, *i.e.*, zero growth assumed). A smaller AIC value indicates a better model.

| Growth Model Test for Each Treatment | AIC   |
|--------------------------------------|-------|
| <b>Iron Treatment</b>                |       |
| Categorical model                    | −41.1 |
| Log-linear model                     | 37.9  |
| Sigmoidal curve model                | 51.5  |
| <b>Copper Treatment</b>              |       |
| Categorical model                    | −1.6  |
| Log-linear model                     | 48.2  |
| Sigmoidal curve model                | 123   |

**Table S2.** Comparison of different anatoxin-a quota models using Akaike Information Criteria (AIC) to evaluate the goodness of fit. For each dataset, a linear model (explaining the overall trend of the data over time) was compared to a categorical model (where days were treated as a factor) and intercept model (where time was not a variable, *i.e.*, zero change in anatoxin-a quota assumed). A smaller AIC value indicates a better model.

| Growth Model Test for Each Treatment | AIC  |
|--------------------------------------|------|
| <b>Copper Treatment</b>              |      |
| Categorical model                    | 48.1 |
| Log-linear model                     | 98.8 |
| Intercept model                      | 222  |
| <b>Iron Treatment</b>                |      |
| Categorical model                    | 57.8 |
| Log-linear model                     | 106  |
| Intercept model                      | 137  |

**Table S3.** Nominal iron and copper concentrations series for modified MLA culture media used for each treatment in this experiment.

| Treatment                        | Fe [ppb] | Cu [ppb] |
|----------------------------------|----------|----------|
| MLA <sub>1</sub> × Fe = 1 × Cu * | 400      | 2.5      |
| MLA <sub>0.1</sub> × Fe          | 40       | 2.5      |
| MLA <sub>2</sub> × Fe            | 800      | 2.5      |
| MLA <sub>10</sub> × Fe           | 4000     | 2.5      |
| MLA <sub>10</sub> × Cu           | 400      | 25       |
| MLA <sub>100</sub> × Cu          | 400      | 250      |

Note: \* MLA<sub>1</sub> × Fe = 1 × Cu represents standard MLA medium without modifications.

**Table S4.** Harvest regime for the iron and copper stressor experiment.\*

| Harvest day | MLA control samples | Culture samples† | Additional culture samples† |
|-------------|---------------------|------------------|-----------------------------|
| Day 0       | ✓                   | ✓                |                             |
| Day 3       |                     | ✓                |                             |
| Day 6       | ✓                   | ✓                |                             |
| Day 9       |                     | ✓                |                             |
| Day 10      |                     |                  | ✓                           |
| Day 12      |                     | ✓                |                             |
| Day 13      |                     |                  | ✓                           |
| Day 17      | ✓                   | ✓                |                             |
| Day 22      |                     | ✓                |                             |
| Day 32      | ✓                   | ✓                |                             |
| Day 41      |                     | ✓                |                             |
| Day 49      | ✓                   | ✓                |                             |

Notes: \*: MLA control samples contain only culture medium of each treatment. Culture samples were inoculated with CYN52 for each treatment. Additional culture samples were inoculated for the standard MLA treatment to collect extra data for the anatoxin-a profile at the early stages of the growth profile; †: Each set of culture samples consists of three cultures for cyanotoxin and three cultures for growth analyses for each treatment.
